# Supplementary material for: Evaluation of cytotoxic properties of two fluorescent fac-Re(CO)3 complexes bearing an N,N-bidentate benzimidazole coligand
Source: Royal Society of Chemistry journal article supplement (doi:10.1039/d2ra05992d), 2022-01-01
Supplement: d2ra05992d1.pdf [file d2ra05992d1.pdf]

### Supporting information

|                 |                                                                                                                                                                                                                                                      |            |
|-----------------|------------------------------------------------------------------------------------------------------------------------------------------------------------------------------------------------------------------------------------------------------|------------|
| <b>Fig. S1</b>  | IR spectra of tricarbonyl rhenium(I) complexes a) <b>3</b> , and b) <b>4</b> .                                                                                                                                                                       | <b>S2</b>  |
| <b>Fig. S2</b>  | <sup>1</sup> H NMR spectrum of <b>3</b> in acetone-d <sub>6</sub> .                                                                                                                                                                                  | <b>S3</b>  |
| <b>Fig. S3</b>  | <sup>1</sup> H NMR spectrum of <b>4</b> in acetone-d <sub>6</sub> .                                                                                                                                                                                  | <b>S4</b>  |
| <b>Fig. S4</b>  | <sup>13</sup> C NMR spectrum of <b>3</b> in acetone-d <sub>6</sub> .                                                                                                                                                                                 | <b>S5</b>  |
| <b>Fig. S5</b>  | <sup>13</sup> C NMR spectrum of <b>4</b> in acetone-d <sub>6</sub> .                                                                                                                                                                                 | <b>S6</b>  |
| <b>Fig. S6</b>  | Electronic absorption spectra of <b>3</b> in different solvents.                                                                                                                                                                                     | <b>S7</b>  |
| <b>Fig. S7</b>  | Electronic absorption spectrum of <b>3</b> in dichloromethane.                                                                                                                                                                                       | <b>S8</b>  |
| <b>Fig. S8</b>  | Electronic absorption spectrum of <b>4</b> in dichloromethane.                                                                                                                                                                                       | <b>S9</b>  |
| <b>Table S1</b> | Atomic coordinates of the optimized structure of <b>3</b> .                                                                                                                                                                                          | <b>S10</b> |
| <b>Table S2</b> | Atomic coordinates of the optimized structure of <b>4</b> .                                                                                                                                                                                          | <b>S11</b> |
| <b>Table S3</b> | Selected calculated bond lengths, and bond angles of complexes <b>3</b> and <b>4</b> calculated using B3LYP/LANL2DZ method.                                                                                                                          | <b>S13</b> |
| <b>Fig. S9</b>  | Calculated electronic absorption spectra of <b>3</b> and <b>4</b> using B3LYP/LANL2DZ method in combination with SMD solvation model.                                                                                                                | <b>S14</b> |
| <b>Fig. S10</b> | Calculated electronic absorption spectra of <b>3</b> and <b>4</b> using CAM-B3LYP/LANL2DZ method in combination with SMD solvation model.                                                                                                            | <b>S15</b> |
| <b>Table S4</b> | Computed excitation energies (eV), electronic transition configurations and oscillator strengths ( <i>f</i> ) of rhenium(I) compounds (selected, <i>f</i> > 0.001) (Selected)                                                                        | <b>S16</b> |
| <b>Table S5</b> | Selected frontiers molecular orbitals of <b>4</b> in the singlet state calculated at B3LYP/LANL2DZ level of theory.                                                                                                                                  | <b>S18</b> |
| <b>Fig. S10</b> | The dose response curve of complex <b>3</b> on Caco-2, MCF7, HepG2 and splenocytes cell lines showing the IC <sub>50</sub> at each cell line.                                                                                                        | <b>S21</b> |
| <b>Fig. S11</b> | The dose response curve of complex <b>4</b> on Caco-2, MCF7, HepG2 and splenocytes cell lines showing the IC <sub>50</sub> at each cell line.                                                                                                        | <b>S22</b> |
| <b>Table S6</b> | The IC <sub>50</sub> of compounds <b>3</b> and <b>4</b> each sample on different cell lines.                                                                                                                                                         | <b>S23</b> |
| <b>Fig. S12</b> | The DNA fragmentation by TUNEL assay in Caco-2 cell line. The photos show high incorporation of BrdU-Red because of DNA fragmentation in comparison to the control. Magnification 20X. Scale bar 50 μm.                                              | <b>S24</b> |
| <b>Fig. S13</b> | The DNA fragmentation by TUNEL assay in MCF7 cell line. The photos show high incorporation of BrdU-Red in complex <b>4</b> more than complex <b>3</b> because of DNA fragmentation in comparison to the control. Magnification 20X. Scale bar 50 μm. | <b>S25</b> |
| <b>Fig. S14</b> | The DNA fragmentation by TUNEL assay in HepG2 cell line. The photos show high incorporation of BrdU-Red because of DNA fragmentation in comparison to the control. Magnification 20X. Scale bar 50 μm.                                               | <b>S26</b> |

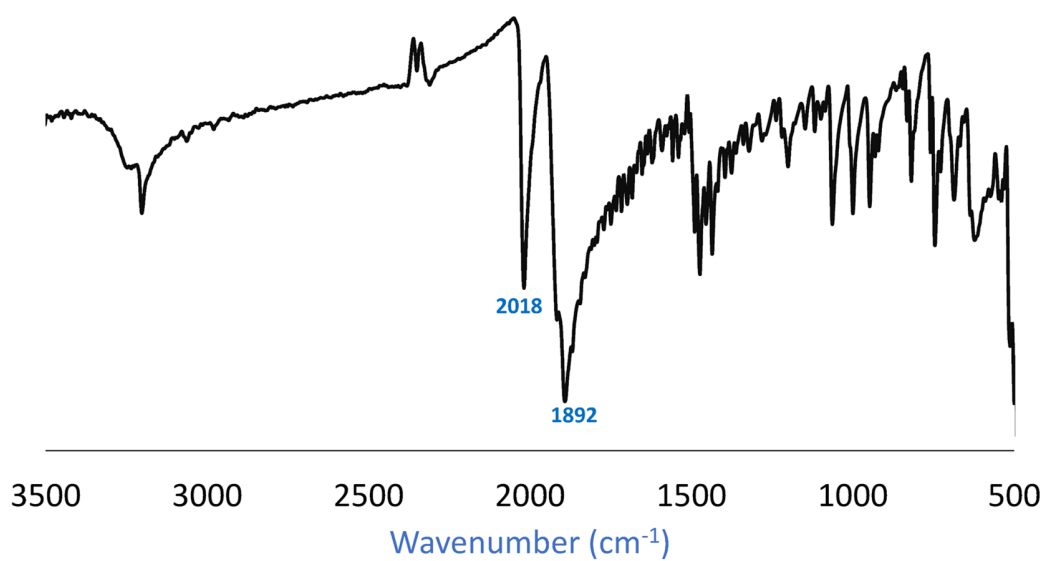

a)

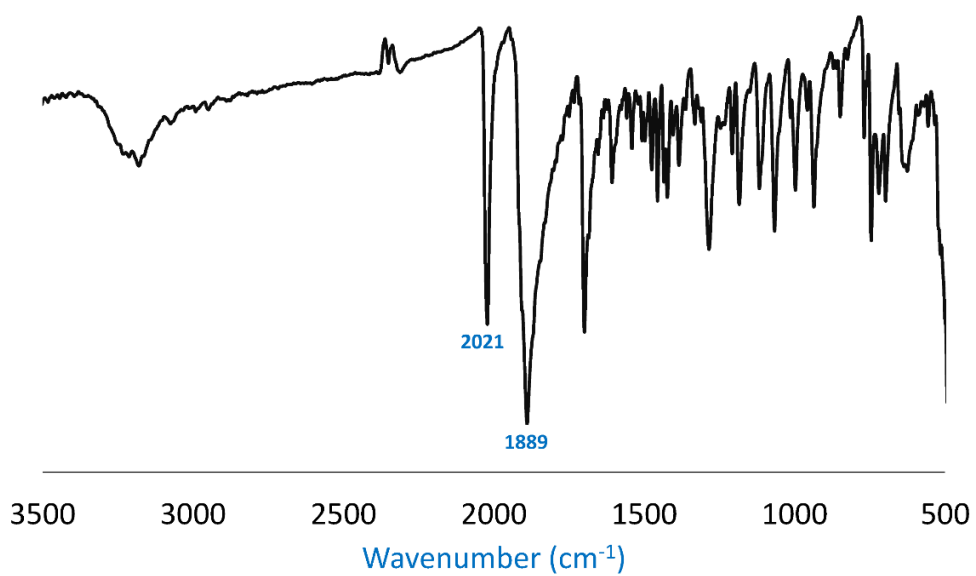

b)

**Fig. S1** ATR-IR spectra of tricarbonyl rhenium(I) complexes a) **3**, and b) **4**.

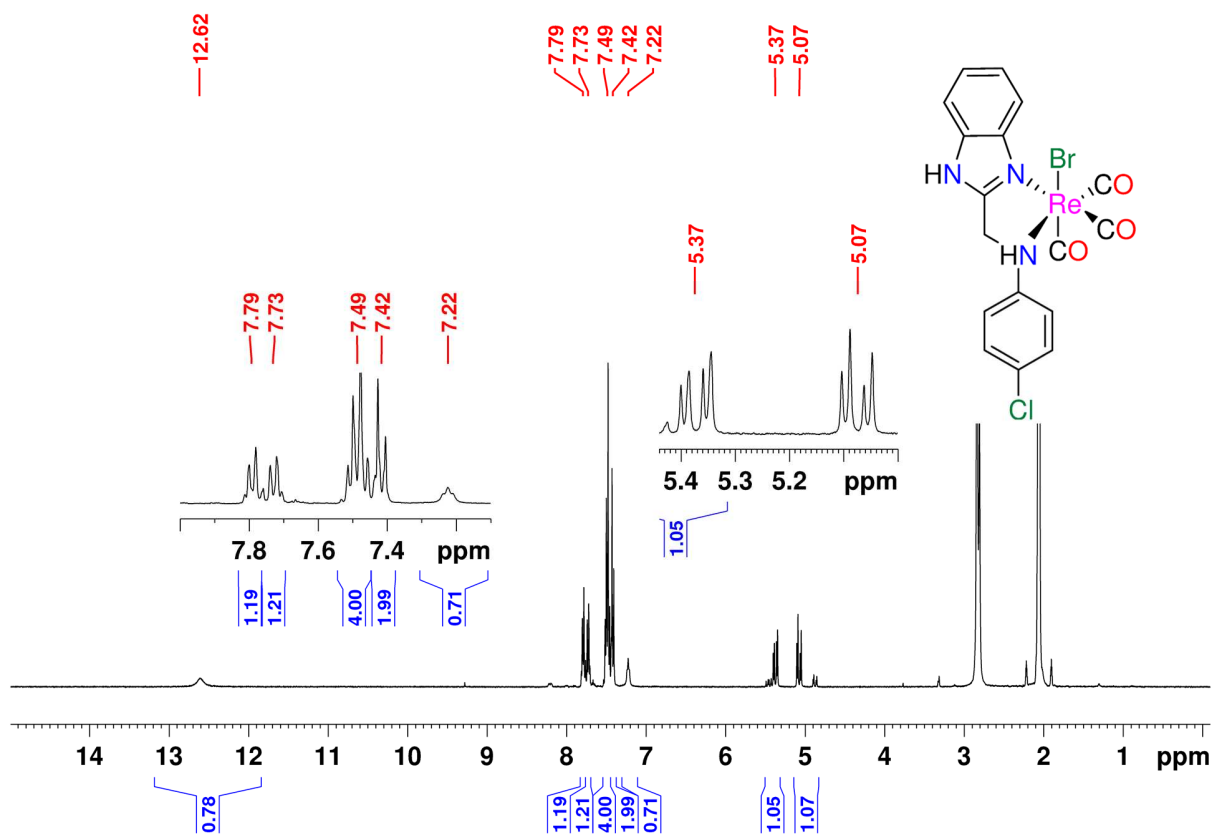

Fig. S2 <sup>1</sup>H NMR spectrum of 3 in acetone-d<sub>6</sub>.

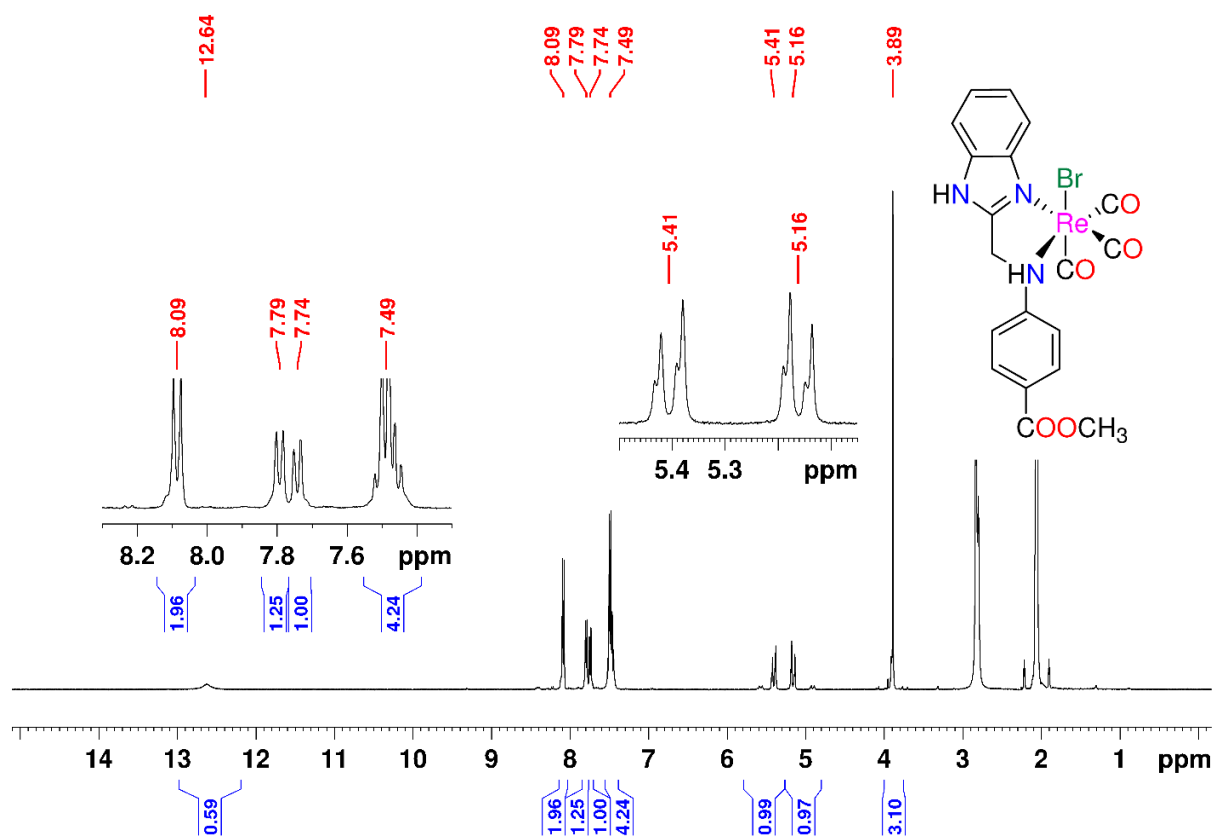

Fig. S3  $^1\text{H}$  NMR spectrum of **4** in acetone- $\text{d}_6$ .

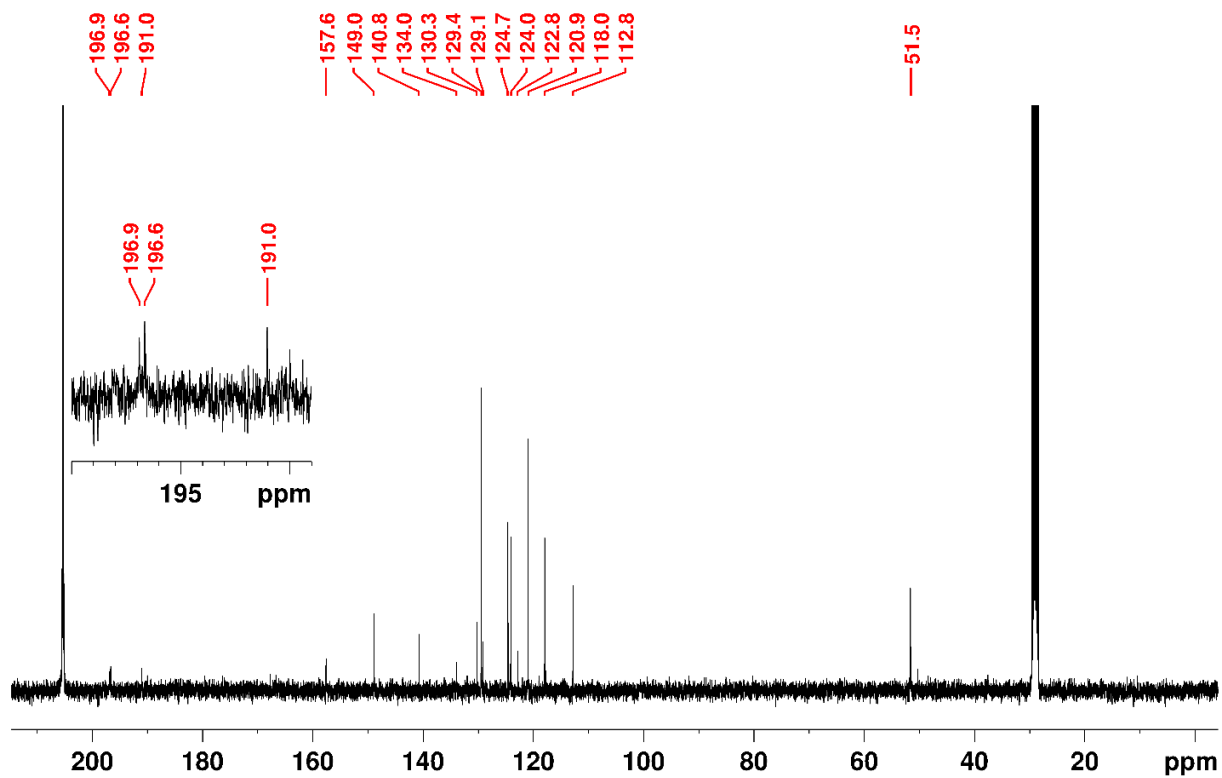

Fig. S4  $^{13}\text{C}$  NMR spectrum of **3** in acetone- $d_6$ .

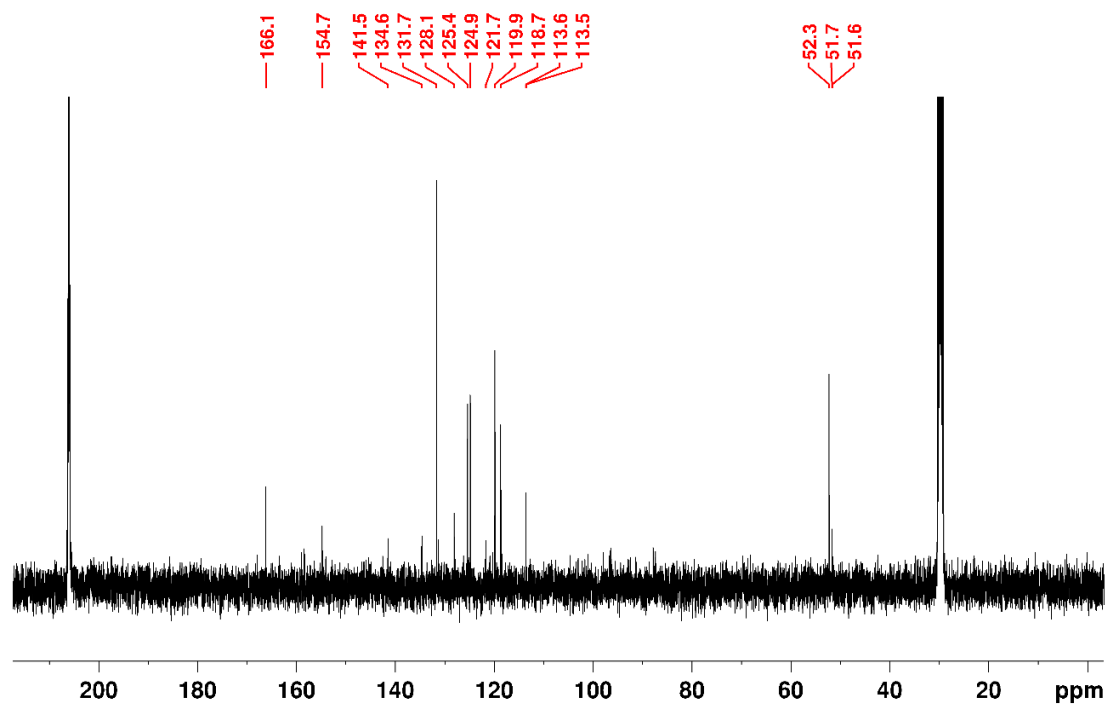

Fig. S5  $^{13}\text{C}$  NMR spectrum of **4** in acetone- $\text{d}_6$ .

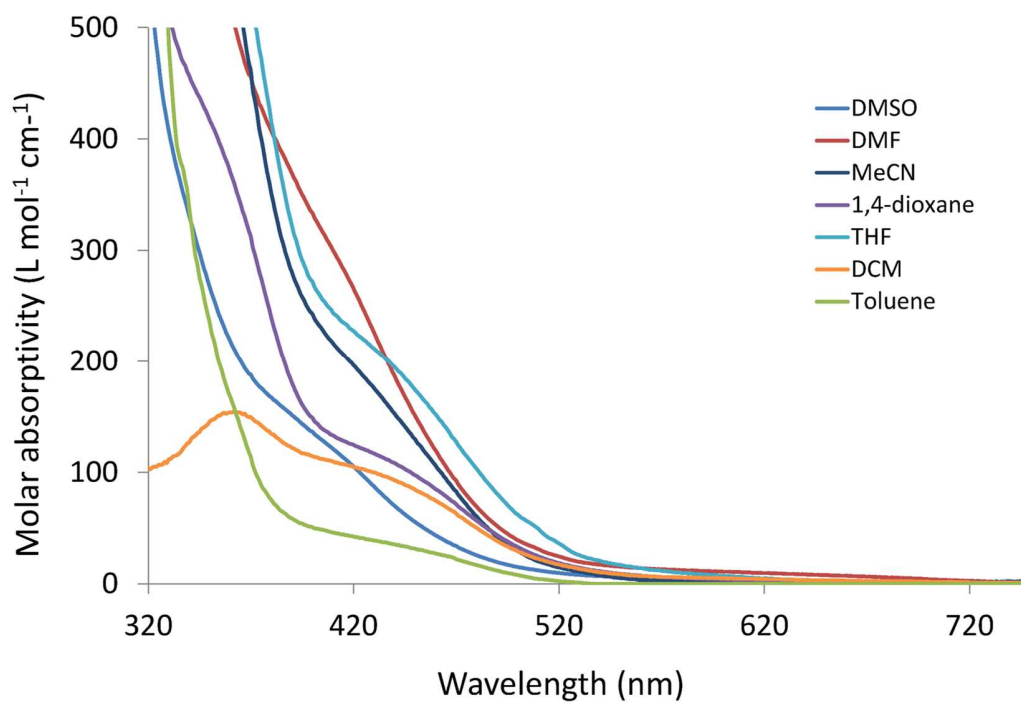

**Fig. S6** Electronic absorption spectra of **3** in different solvents.

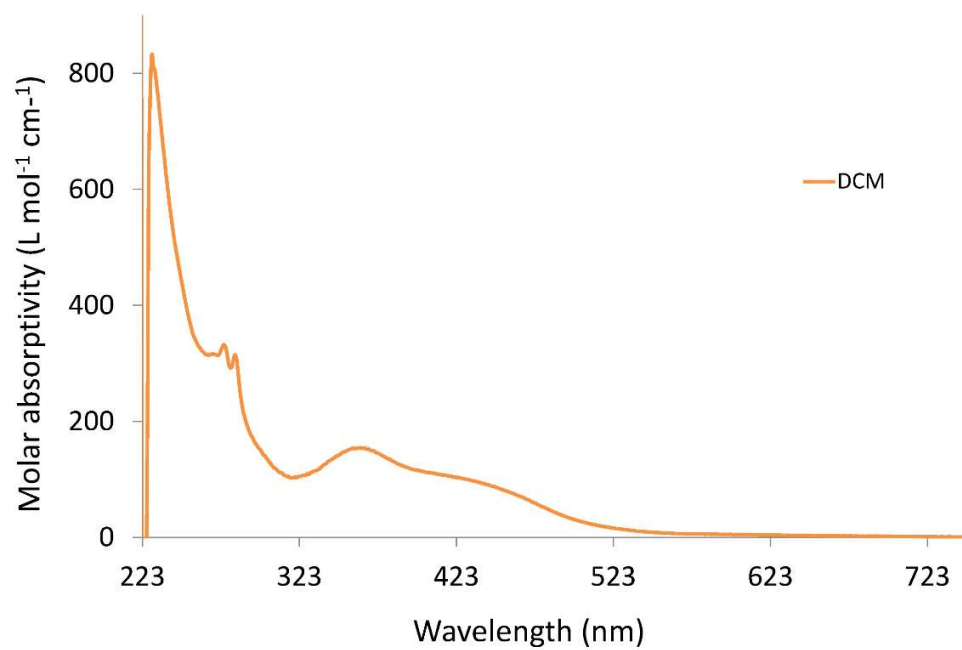

**Fig. S7** Electronic absorption spectrum of **3** in dichloromethane.



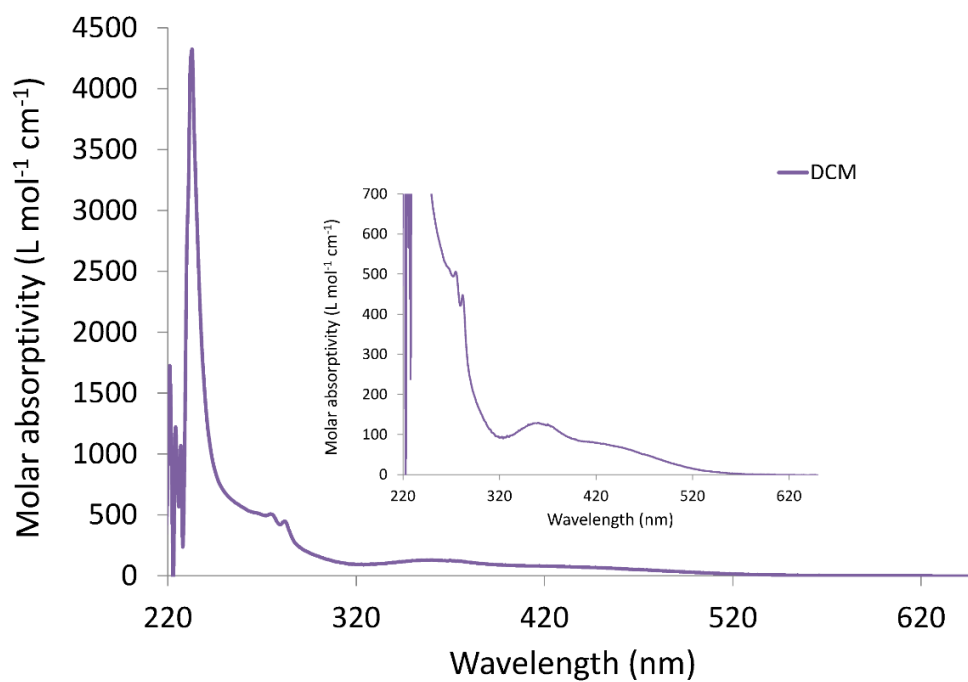

**Fig. S8** Electronic absorption spectrum of **4** in dichloromethane.

| <b>Table S1</b> Atomic coordinates of the optimized structure of <b>3</b> . |               |             |                         |           |           |
|-----------------------------------------------------------------------------|---------------|-------------|-------------------------|-----------|-----------|
| Center Number                                                               | Atomic Number | Atomic Type | Coordinates (Angstroms) |           |           |
|                                                                             |               |             | X                       | Y         | Z         |
| 1                                                                           | 8             | 0           | -1.916633               | -2.956455 | -0.258332 |
| 2                                                                           | 8             | 0           | 2.398921                | -2.955764 | -1.242609 |
| 3                                                                           | 6             | 0           | 3.14213                 | 0.944035  | -0.2337   |
| 4                                                                           | 6             | 0           | -2.885246               | 1.237185  | -0.906194 |
| 5                                                                           | 6             | 0           | -4.575999               | 0.634578  | 1.271055  |
| 6                                                                           | 7             | 0           | 2.26975                 | 2.932181  | 0.365476  |
| 7                                                                           | 6             | 0           | -4.278939               | 1.247178  | -1.079717 |
| 8                                                                           | 6             | 0           | 5.510314                | 0.440355  | -0.508827 |
| 9                                                                           | 7             | 0           | -0.883956               | 0.921887  | 0.557984  |
| 10                                                                          | 6             | 0           | -3.179413               | 0.639809  | 1.441487  |
| 11                                                                          | 6             | 0           | 5.827732                | 1.790013  | -0.161472 |
| 12                                                                          | 6             | 0           | -0.214787               | 2.24905   | 0.30152   |
| 13                                                                          | 7             | 0           | 1.742444                | 0.821265  | -0.181066 |
| 14                                                                          | 6             | 0           | -2.335394               | 0.943285  | 0.357129  |
| 15                                                                          | 6             | 0           | 4.828887                | 2.7269    | 0.151769  |
| 16                                                                          | 6             | 0           | -5.106118               | 0.949471  | 0.013654  |
| 17                                                                          | 6             | 0           | 3.494493                | 2.286415  | 0.110713  |
| 18                                                                          | 6             | 0           | 4.177993                | 0.063153  | -0.532874 |
| 19                                                                          | 6             | 0           | -1.055391               | -2.145287 | -0.316963 |
| 20                                                                          | 6             | 0           | 1.25991                 | 2.014029  | 0.175318  |
| 21                                                                          | 6             | 0           | 1.598185                | -2.143447 | -0.919213 |
| 22                                                                          | 1             | 0           | -2.757233               | 0.389626  | 2.411847  |
| 23                                                                          | 1             | 0           | -5.230396               | 0.391014  | 2.101384  |
| 24                                                                          | 1             | 0           | -4.708941               | 1.4651    | -2.051777 |
| 25                                                                          | 1             | 0           | -2.245544               | 1.425025  | -1.763627 |
| 26                                                                          | 1             | 0           | 6.303624                | -0.263645 | -0.742939 |
| 27                                                                          | 1             | 0           | 6.87121                 | 2.09302   | -0.139089 |
| 28                                                                          | 1             | 0           | 5.087429                | 3.747985  | 0.41624   |
| 29                                                                          | 1             | 0           | 2.149807                | 3.89453   | 0.652235  |
| 30                                                                          | 1             | 0           | -0.675896               | 0.628459  | 1.528673  |
| 31                                                                          | 1             | 0           | -0.610964               | 2.658187  | -0.634263 |
| 32                                                                          | 1             | 0           | -0.444997               | 2.965564  | 1.102755  |
| 33                                                                          | 75            | 0           | 0.335945                | -0.811456 | -0.376176 |
| 34                                                                          | 35            | 0           | 0.818145                | -1.16627  | 2.291948  |
| 35                                                                          | 6             | 0           | -0.070465               | -0.372158 | -2.176188 |
| 36                                                                          | 8             | 0           | -0.337406               | -0.06676  | -3.300859 |
| 37                                                                          | 17            | 0           | -6.909007               | 0.962405  | -0.211399 |
| Rotational constants (GHz)                                                  |               |             | 0.2471111               | 0.0889260 | 0.0829737 |

| <b>Table S2</b> Atomic coordinates of the optimized structure of <b>3</b> . |               |             |                         |           |           |
|-----------------------------------------------------------------------------|---------------|-------------|-------------------------|-----------|-----------|
| Center Number                                                               | Atomic Number | Atomic Type | Coordinates (Angstroms) |           |           |
|                                                                             |               |             | X                       | Y         | Z         |
| 1                                                                           | 8             | 0           | -1.423883               | -3.023069 | -0.465851 |
| 2                                                                           | 8             | 0           | 2.826853                | -2.70517  | -1.665058 |
| 3                                                                           | 6             | 0           | 3.473221                | 1.068926  | -0.228576 |
| 4                                                                           | 6             | 0           | -2.580491               | 1.240744  | -0.557496 |
| 5                                                                           | 6             | 0           | -4.124321               | 0.114709  | 1.511332  |
| 6                                                                           | 7             | 0           | 2.5628                  | 2.928711  | 0.65735   |
| 7                                                                           | 6             | 0           | -3.975449               | 1.182707  | -0.677143 |
| 8                                                                           | 6             | 0           | 5.840822                | 0.701534  | -0.67239  |
| 9                                                                           | 7             | 0           | -0.502                  | 0.78082   | 0.753173  |
| 10                                                                          | 6             | 0           | -2.729682               | 0.18005   | 1.639287  |
| 11                                                                          | 6             | 0           | 6.127456                | 2.009679  | -0.172922 |
| 12                                                                          | 6             | 0           | 0.105173                | 2.154958  | 0.631775  |
| 13                                                                          | 7             | 0           | 2.08343                 | 0.881518  | -0.125091 |
| 14                                                                          | 6             | 0           | -1.957094               | 0.746581  | 0.606292  |
| 15                                                                          | 6             | 0           | 5.113132                | 2.85855   | 0.30051   |
| 16                                                                          | 6             | 0           | -4.7566                 | 0.623801  | 0.357902  |
| 17                                                                          | 6             | 0           | 3.794776                | 2.371814  | 0.265228  |
| 18                                                                          | 6             | 0           | 4.523101                | 0.275363  | -0.682886 |
| 19                                                                          | 6             | 0           | -0.600597               | -2.171541 | -0.470938 |
| 20                                                                          | 6             | 0           | 1.577994                | 1.999256  | 0.401791  |
| 21                                                                          | 6             | 0           | 2.013293                | -1.975145 | -1.205472 |
| 22                                                                          | 1             | 0           | -2.243961               | -0.221091 | 2.525589  |
| 23                                                                          | 1             | 0           | -4.734841               | -0.324685 | 2.294385  |
| 24                                                                          | 1             | 0           | -4.465388               | 1.552991  | -1.570808 |
| 25                                                                          | 1             | 0           | -1.990754               | 1.635099  | -1.379955 |
| 26                                                                          | 1             | 0           | 6.64576                 | 0.065336  | -1.028874 |
| 27                                                                          | 1             | 0           | 7.159447                | 2.350246  | -0.15941  |
| 28                                                                          | 1             | 0           | 5.348589                | 3.848587  | 0.679745  |
| 29                                                                          | 1             | 0           | 2.423815                | 3.841543  | 1.069841  |
| 30                                                                          | 1             | 0           | -0.236504               | 0.380009  | 1.669839  |
| 31                                                                          | 1             | 0           | -0.355557               | 2.663925  | -0.221341 |
| 32                                                                          | 1             | 0           | -0.103313               | 2.754361  | 1.529309  |
| 33                                                                          | 6             | 0           | -6.240272               | 0.542841  | 0.271395  |
| 34                                                                          | 8             | 0           | -6.981538               | 0.068128  | 1.152743  |
| 35                                                                          | 8             | 0           | -6.730461               | 1.062492  | -0.912194 |
| 36                                                                          | 6             | 0           | -8.191                  | 1.012803  | -1.103195 |
| 37                                                                          | 1             | 0           | -8.694228               | 1.577187  | -0.311876 |
| 38                                                                          | 1             | 0           | -8.362179               | 1.465842  | -2.080577 |
| 39                                                                          | 1             | 0           | -8.537247               | -0.025167 | -1.083531 |
| 40                                                                          | 75            | 0           | 0.731619                | -0.777466 | -0.443019 |
| 41                                                                          | 35            | 0           | 1.373898                | -1.413715 | 2.138346  |
| 42                                                                          | 6             | 0           | 0.206952                | -0.150826 | -2.15592  |
| 43                                                                          | 8             | 0           | -0.133918               | 0.268571  | -3.22183  |

|                            |           |           |           |
|----------------------------|-----------|-----------|-----------|
| Rotational constants (GHz) | 0.2374804 | 0.0690647 | 0.0656906 |
|----------------------------|-----------|-----------|-----------|

| <b>Table S3</b> Selected calculated bond lengths, and bond angles of complexes <b>3</b> and <b>4</b> calculated using B3LYP/LANL2DZ method. |           |           |
|---------------------------------------------------------------------------------------------------------------------------------------------|-----------|-----------|
|                                                                                                                                             | <b>3</b>  | <b>4</b>  |
| Re–C19                                                                                                                                      | 1.92832   | 1.92848   |
| Re–C21                                                                                                                                      | 1.91372   | 1.91271   |
| Re–C35 (Re–C42)                                                                                                                             | 1.89689   | 1.89789   |
| Re–Br                                                                                                                                       | 2.73446   | 2.73510   |
| Re–N9                                                                                                                                       | 2.31631   | 2.31969   |
| Re–N13                                                                                                                                      | 2.16381   | 2.16349   |
| C19–O1                                                                                                                                      | 1.18455   | 1.18445   |
| C21–O2                                                                                                                                      | 1.18559   | 1.18576   |
| C35–O36 (C42–O43)                                                                                                                           | 1.19558   | 1.19509   |
|                                                                                                                                             |           |           |
| C19–Re–C21                                                                                                                                  | 90.18172  | 90.25669  |
| C19–Re–C35 (C19–Re–C42)                                                                                                                     | 91.99098  | 91.98524  |
| C19–Re–Br                                                                                                                                   | 90.43087  | 90.44260  |
| C19–Re–N9                                                                                                                                   | 97.19441  | 97.22122  |
| C19–Re–N13                                                                                                                                  | 171.17513 | 171.14605 |
| C21–Re–C35 (C21–Re–C42)                                                                                                                     | 91.90470  | 91.84634  |
| C21–Re–Br                                                                                                                                   | 94.02846  | 94.19794  |
| C21–Re–N9                                                                                                                                   | 169.31287 | 169.28069 |
| C21–Re–N13                                                                                                                                  | 97.01016  | 96.89459  |
| C35–Re–Br (C42–Re–Br)                                                                                                                       | 173.58420 | 173.47596 |
| C35–Re–N9 (C42–Re–N9)                                                                                                                       | 95.54113  | 78.13928  |
| C35–Re–N13 (C42–Re–N13)                                                                                                                     | 92.87072  | 92.99090  |
| Br–Re–N9                                                                                                                                    | 78.25587  | 78.13928  |
| Br–Re–N13                                                                                                                                   | 83.99028  | 83.85523  |
| N9–Re–N13                                                                                                                                   | 75.00801  | 75.01254  |

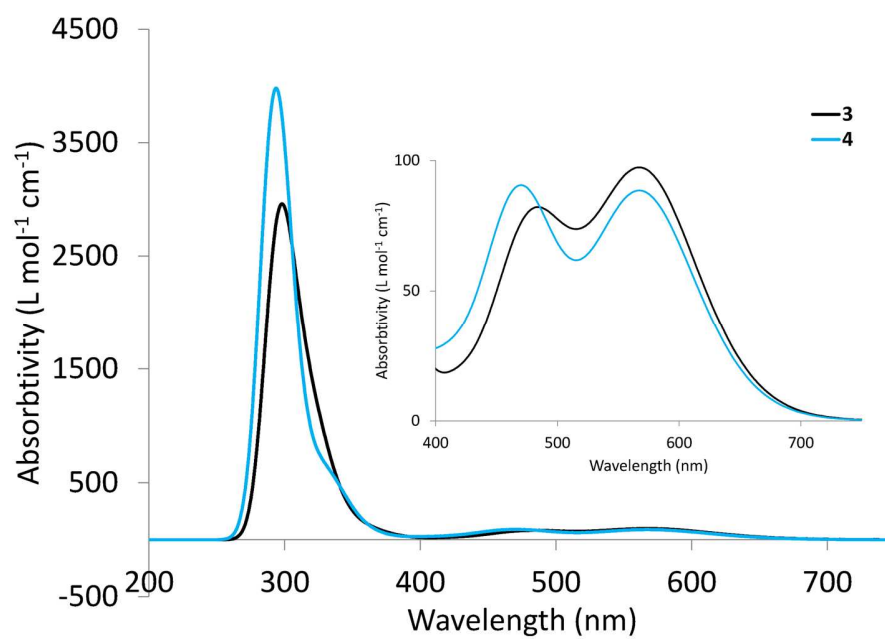

**Fig. S9** Calculated electronic absorption spectra of **3** and **4** using B3LYP/LANL2DZ method in combination with SMD solvation model.

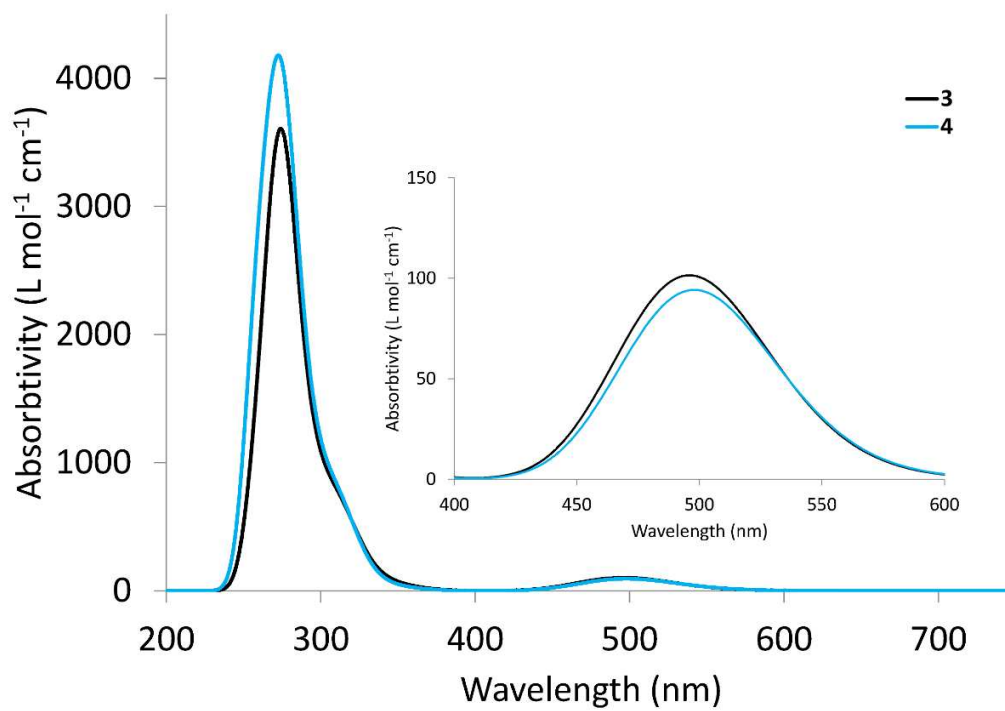

**Fig. S10** Calculated electronic absorption spectra of **3** and **4** using CAM-B3LYP/LANL2DZ method in combination with SMD solvation model.

| <b>Table S4</b> Computed excitation energies (eV), electronic transition configurations and oscillator strengths ( $f$ ) of rhenium(I) compounds (selected, $f > 0.001$ ) ( <b>Selected</b> ) |                 |        |                                                                                      |
|-----------------------------------------------------------------------------------------------------------------------------------------------------------------------------------------------|-----------------|--------|--------------------------------------------------------------------------------------|
| Energy (cm <sup>-1</sup> )                                                                                                                                                                    | Wavelength (nm) | $f$    | Major contributions                                                                  |
| • B3LYP/LANL2DZ method                                                                                                                                                                        |                 |        |                                                                                      |
| ✓ 3                                                                                                                                                                                           |                 |        |                                                                                      |
| 17569                                                                                                                                                                                         | 569             | 0.0012 | HOMO-2( $\beta$ )→LUMO( $\beta$ ) (40%)                                              |
| 21181                                                                                                                                                                                         | 472             | 0.0011 | HOMO( $\beta$ )→LUMO( $\beta$ ) (58%)                                                |
| 22305                                                                                                                                                                                         | 448             | 0.0001 | HOMO-1( $\beta$ )→LUMO( $\beta$ ) (83%)                                              |
| 22679                                                                                                                                                                                         | 440             | 0.0001 | HOMO-4( $\beta$ )→LUMO( $\beta$ ) (63%)                                              |
| 24672                                                                                                                                                                                         | 405             | 0.0003 | HOMO-3( $\beta$ )→LUMO( $\beta$ ) (70%)                                              |
| 34310                                                                                                                                                                                         | 291             | 0.0083 | HOMO( $\alpha$ )→L+1( $\alpha$ ) (36%)                                               |
| ✓ 4                                                                                                                                                                                           |                 |        |                                                                                      |
| 17518                                                                                                                                                                                         | 570             | 0.0013 | HOMO-2( $\beta$ )→LUMO( $\beta$ ) (30%), HOMO( $\beta$ )→LUMO( $\beta$ ) (45%)       |
| 20766                                                                                                                                                                                         | 481             | 0.001  | HOMO-2( $\beta$ )→LUMO( $\beta$ ) (22%), HOMO( $\beta$ )→LUMO( $\beta$ ) (51%)       |
| 21781                                                                                                                                                                                         | 459             | 0.0001 | HOMO-1( $\beta$ )→LUMO( $\beta$ ) (85%)                                              |
| 29714                                                                                                                                                                                         | 336             | 0.0017 | HOMO( $\alpha$ )→LUMO( $\alpha$ ) (22%)                                              |
| 31167                                                                                                                                                                                         | 320             | 0.0074 | HOMO( $\alpha$ )→LUMO( $\alpha$ ) (26%), HOMO( $\alpha$ )→LUMO+1( $\alpha$ ) (23%)   |
| 33635                                                                                                                                                                                         | 297             | 0.0109 | HOMO-2( $\alpha$ )→LUMO+1( $\alpha$ ) (20%)                                          |
| • CAM-B3LYP/LANL2DZ method                                                                                                                                                                    |                 |        |                                                                                      |
| ✓ 3                                                                                                                                                                                           |                 |        |                                                                                      |
| 20099                                                                                                                                                                                         | 497             | 0.0013 | HOMO-2( $\beta$ )→LUMO( $\beta$ ) (25%), HOMO( $\beta$ )→LUMO( $\beta$ ) (21%)       |
| 26087                                                                                                                                                                                         | 383             | 0      | HOMO-4( $\beta$ )→LUMO( $\beta$ ) (78%)                                              |
| 28876                                                                                                                                                                                         | 346             | 0.0001 | HOMO( $\alpha$ )→LUMO( $\alpha$ ) (19%), HOMO( $\beta$ )→LUMO+1( $\beta$ ) (22%)     |
| 29906                                                                                                                                                                                         | 334             | 0.0001 | HOMO-1( $\alpha$ )→LUMO( $\alpha$ ) (22%), HOMO-1( $\beta$ )→LUMO+1( $\beta$ ) (24%) |
| 32157                                                                                                                                                                                         | 310             | 0.0063 | HOMO( $\alpha$ )→LUMO( $\alpha$ ) (22%), HOMO( $\beta$ )→LUMO+1( $\beta$ ) (24%)     |
| 34315                                                                                                                                                                                         | 291             | 0.0021 | HOMO-1( $\alpha$ )→LUMO+2( $\alpha$ ) (22%)                                          |
| 34993                                                                                                                                                                                         | 285             | 0.0051 | HOMO-2( $\beta$ )→LUMO( $\beta$ ) (21%)                                              |
| 38135                                                                                                                                                                                         | 262             | 0.002  | HOMO-6( $\beta$ )→LUMO( $\beta$ ) (35%)                                              |
| ✓ 4                                                                                                                                                                                           |                 |        |                                                                                      |
| 20179                                                                                                                                                                                         | 495             | 0.0014 | HOMO-3( $\beta$ )→LUMO( $\beta$ ) (30%)                                              |
| 25437                                                                                                                                                                                         | 393             | 0      | HOMO-5( $\alpha$ )→LUMO( $\alpha$ ) (22%), HOMO-5( $\beta$ )→LUMO+1( $\beta$ ) (22%) |



|       |     |        |                                                       |
|-------|-----|--------|-------------------------------------------------------|
| 26222 | 381 | 0      | HOMO-4( $\beta$ ) $\rightarrow$ LUMO( $\beta$ ) (78%) |
| 32014 | 312 | 0.0057 | HOMO( $\beta$ ) $\rightarrow$ LUMO+2( $\beta$ ) (21%) |
| 34567 | 289 | 0.0054 | HOMO-2( $\beta$ ) $\rightarrow$ LUMO( $\beta$ ) (26%) |

**Table S5** Selected frontiers molecular orbitals of **4** in the singlet state calculated at B3LYP/LANL2DZ level of theory.

| Orbital           | Frontier molecular orbital                                                           |
|-------------------|--------------------------------------------------------------------------------------|
| LUMO+2( $\beta$ ) | 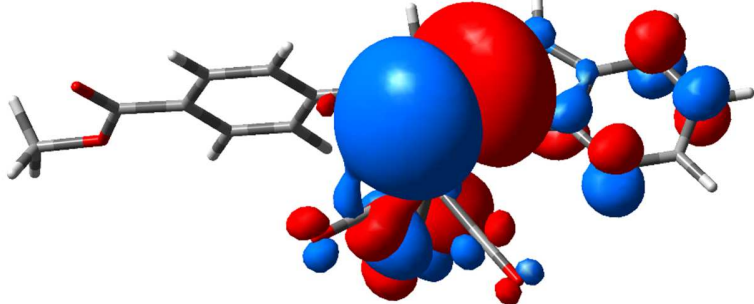   |
| LUMO+1( $\beta$ ) |   |
| HOMO( $\beta$ )   |  |
| HOMO-1( $\beta$ ) |  |

|                    |                                                                                      |
|--------------------|--------------------------------------------------------------------------------------|
| HOMO-2( $\beta$ )  | 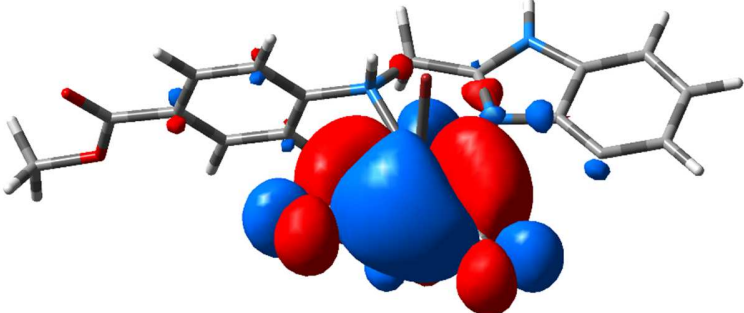   |
| HOMO-3( $\beta$ )  |    |
| HOMO-6( $\beta$ )  |   |
|                    |                                                                                      |
| LUMO+1( $\alpha$ ) |  |

|                    |                                                                                      |
|--------------------|--------------------------------------------------------------------------------------|
| LUMO( $\alpha$ )   | 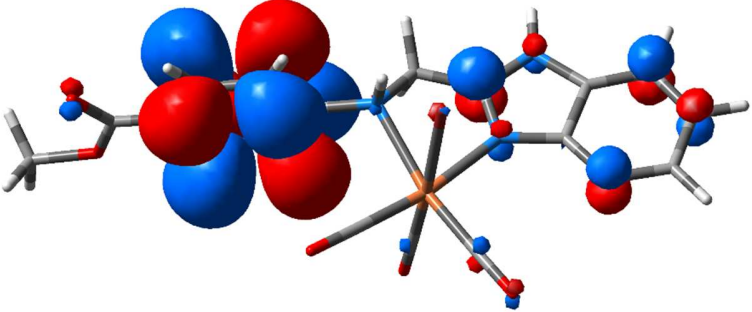   |
| HOMO-2( $\alpha$ ) |    |
| HOMO-5( $\alpha$ ) |  |

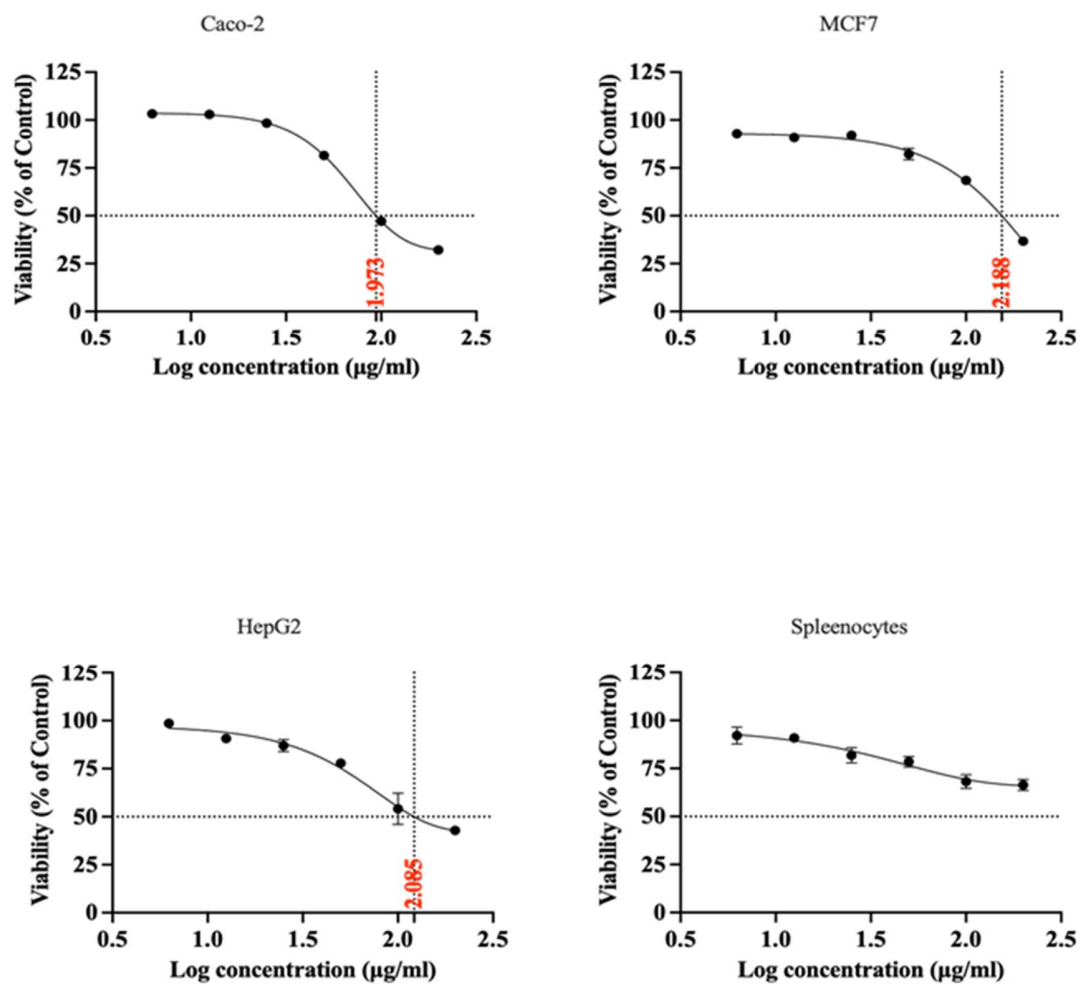

**Fig. S10** The dose response curve of complex **3** on Caco-2, MCF7, HepG2 and splenocytes cell lines showing the IC<sub>50</sub> at each cell line.

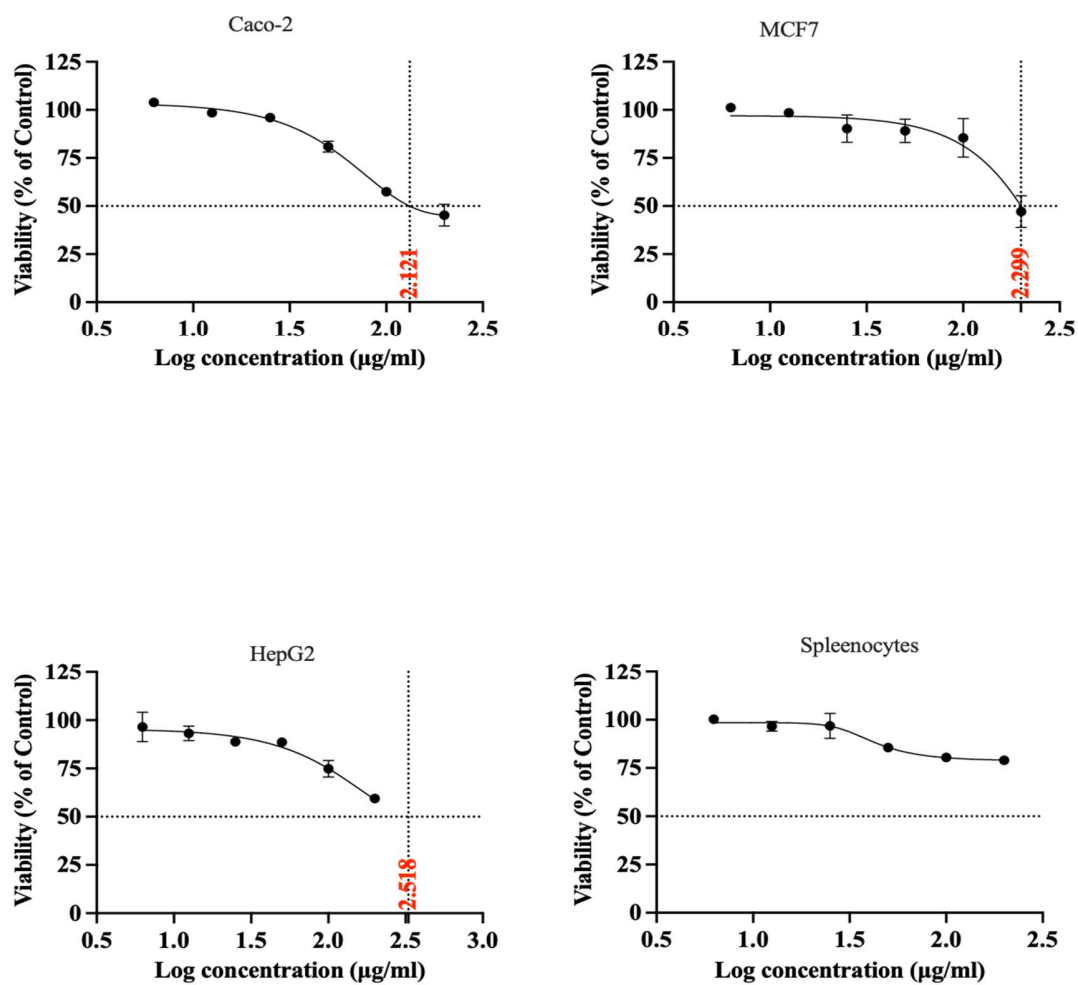

**Fig. S11** The dose response curve of complex 4 on Caco-2, MCF7, HepG2 and splenocytes cell lines showing the IC<sub>50</sub> at each cell line.

**Table S6** The IC<sub>50</sub> of compounds **3** and **4** each sample on different cell lines.

| IC <sub>50</sub><br>( $\mu\text{g/mL}$ ) | Caco-2             | MCF7              | HepG2             | Splenocytes |
|------------------------------------------|--------------------|-------------------|-------------------|-------------|
| <b>3</b>                                 | 93.74 $\pm$ 0.02   | 155.85 $\pm$ 1.07 | 124.6 $\pm$ 37.46 | NA          |
| <b>4</b>                                 | 149.73 $\pm$ 19.75 | 203.83 $\pm$ 9.87 | 289.3 $\pm$ 56.9  | NA          |

• NA denotes Not available

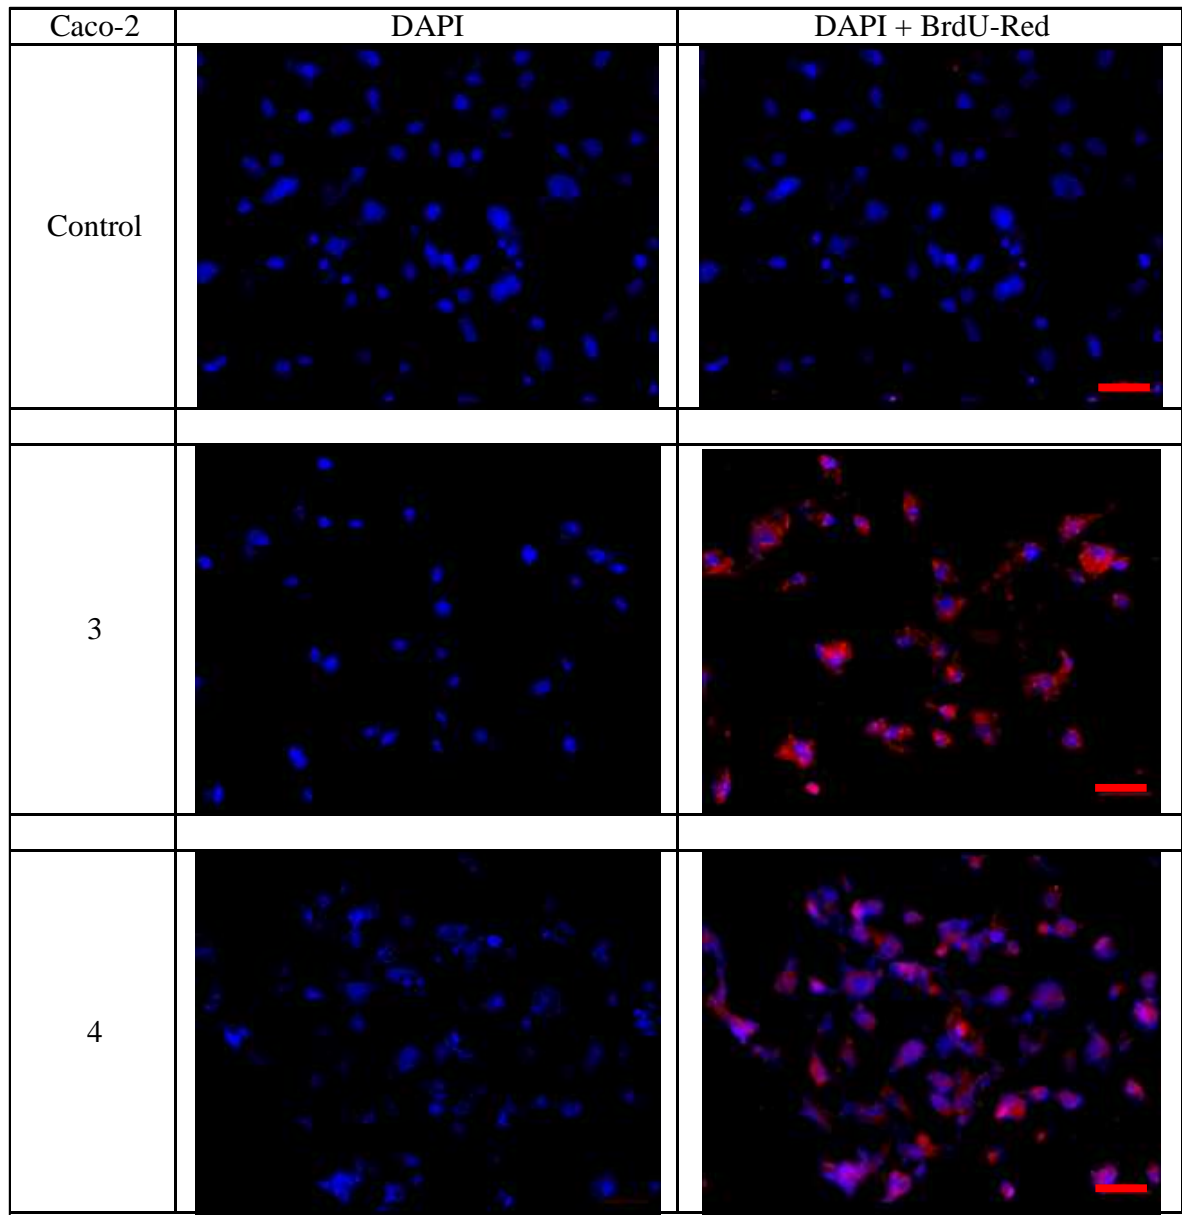

**Fig. S12** The DNA fragmentation by TUNEL assay in Caco-2 cell line. The photos show high incorporation of BrdU-Red because of DNA fragmentation in comparison to the control. Magnification 20X. Scale bar 50  $\mu$ m.



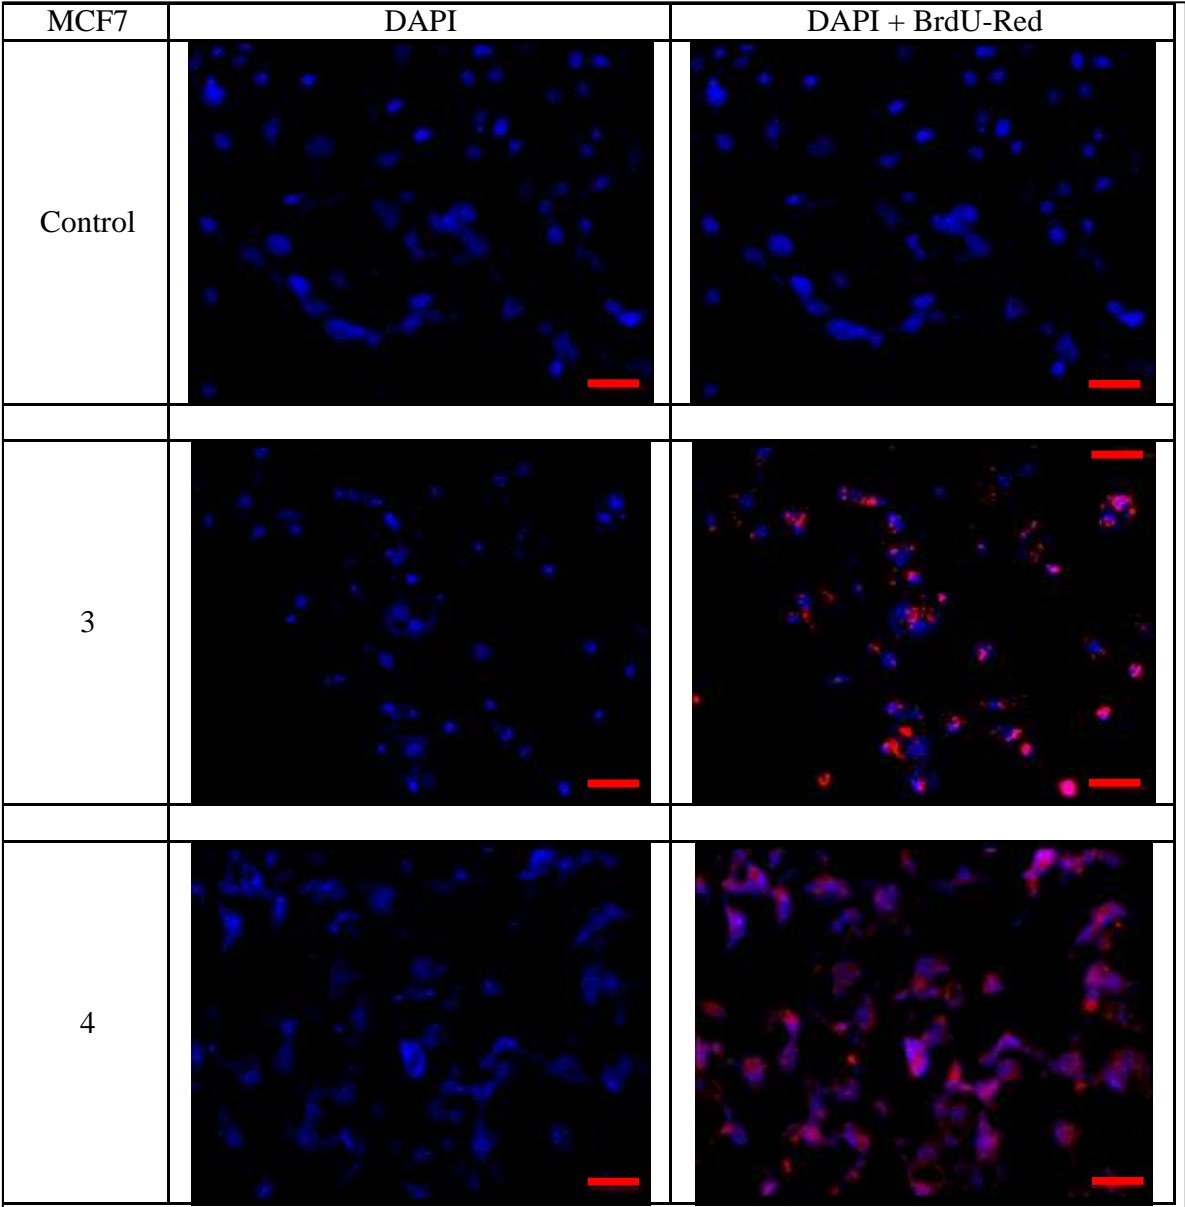

**Fig. S13** The DNA fragmentation by TUNEL assay in MCF7 cell line. The photos show high incorporation of BrdU-Red in complex **4** more than complex **3** because of DNA fragmentation in comparison to the control. Magnification 20X. Scale bar 50  $\mu\text{m}$ .

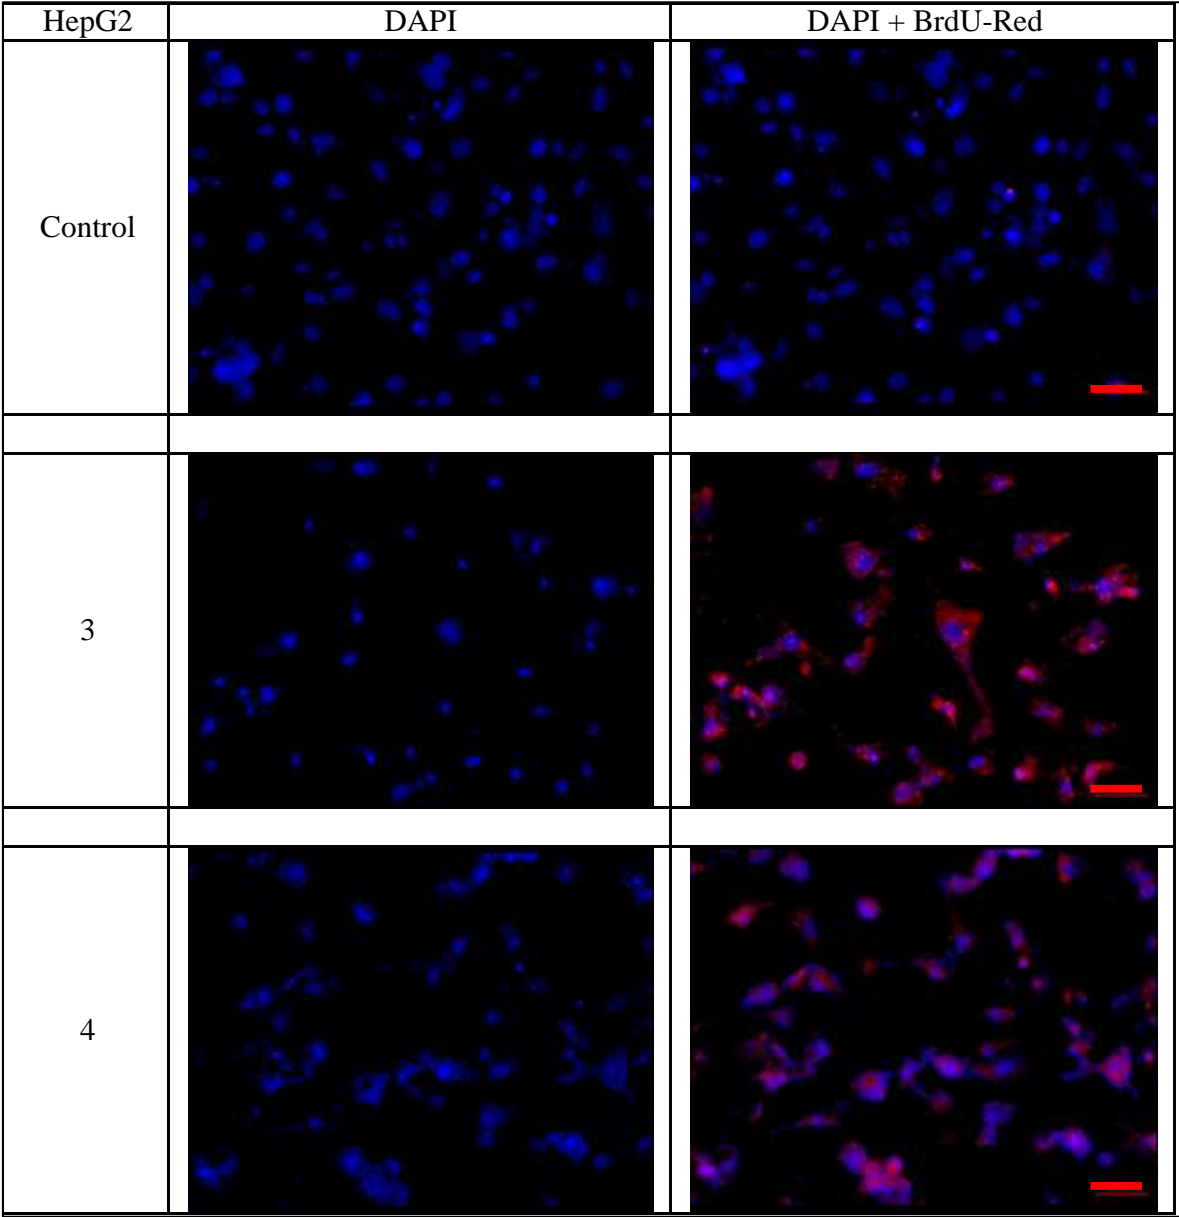

**Fig. S14** The DNA fragmentation by TUNEL assay in HepG2 cell line. The photos show high incorporation of BrdU-Red because of DNA fragmentation in comparison to the control. Magnification 20X. Scale bar 50  $\mu$ m.
